# Supplementary material
Source: PubMed Central journal article supplement (PMC2287334)
Supplement: plntphys_pp.107.115170_1.pdf [file plntphys_pp.107.115170_1.pdf]

### “Undiluted” control grana membranes

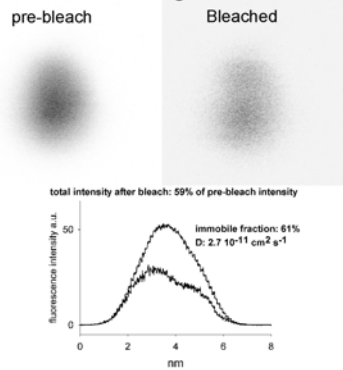

### “Highly diluted” fused grana membranes

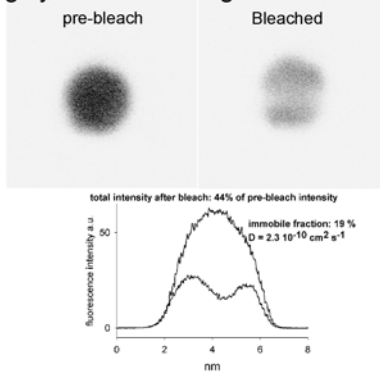

**Figure S1** Examples for the estimation of the immobile fraction and the diffusion coefficient in undiluted and highly diluted membranes (same as Figure 3). Unlike Figure 2 the degree of bleaching for the undiluted BBY membrane is much lower. However analyzing the fluorescence recovery kinetics reveals similar values as in Figure 2 indicating that the degree of bleaching does not influence the estimation of the immobile fraction and  $D$ .
