# Supplementary material
Source: PubMed Central journal article supplement (PMC2287334)
Supplement: plntphys_pp.107.115170_2.pdf [file plntphys_pp.107.115170_2.pdf]

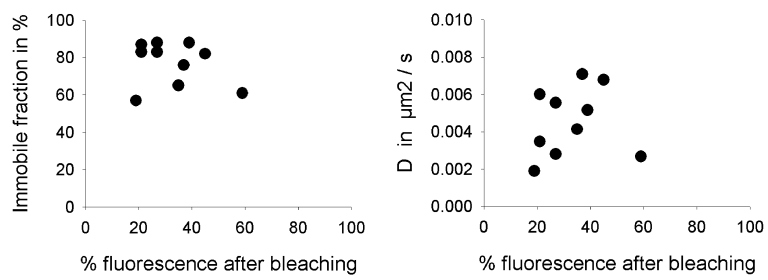

**Figure S2** Dependency of the immobile fraction and the diffusion coefficient ( $D$ ) on the bleaching efficiency for undiluted control BBY membranes. Note that both parameters are not dependent on the degree of bleaching.
